# Supplementary material for: Impact of Myopia on Corneal Biomechanics in Glaucoma and Nonglaucoma Patients
Source: PubMed Central journal article supplement — Invest Ophthalmol Vis Sci. 2017 Oct;58(12):4990–6. doi: 10.1167/iovs.17-22219 (PMC5627793; doi:10.1167/iovs.17-22219), 2017-10
Supplement: iovs-58-11-32_s01.pdf [file iovs-58-11-32_s01.pdf]

**Supplementary Table S1.** Unadjusted and Adjusted Effect of Myopia and Other Covariates in the POAG Group

|                 | CDA                                     |                              | ICA                            |                              | OCA                            |                              | ICV                             |                              | OCV                                    |                                        | PD                             |                              | Radius                         |                              |
|-----------------|-----------------------------------------|------------------------------|--------------------------------|------------------------------|--------------------------------|------------------------------|---------------------------------|------------------------------|----------------------------------------|----------------------------------------|--------------------------------|------------------------------|--------------------------------|------------------------------|
|                 | $\beta$ unadj.<br>( <i>P</i> )          | $\beta$ adj.<br>( <i>P</i> ) | $\beta$ unadj.<br>( <i>P</i> ) | $\beta$ adj.<br>( <i>P</i> ) | $\beta$ unadj.<br>( <i>P</i> ) | $\beta$ adj.<br>( <i>P</i> ) | $\beta$ unadj.<br>( <i>P</i> )  | $\beta$ adj.<br>( <i>P</i> ) | $\beta$ unadj.<br>( <i>P</i> )         | $\beta$ adj.<br>( <i>P</i> )           | $\beta$ unadj.<br>( <i>P</i> ) | $\beta$ adj.<br>( <i>P</i> ) | $\beta$ unadj.<br>( <i>P</i> ) | $\beta$ adj.<br>( <i>P</i> ) |
| Myopia          | 0.10<br><b>(0.001)†</b>                 | 0.10<br>(0.001)†             | 0.002<br>(0.94)                | 0.03<br>(0.35)               | -0.15<br>(0.07)                | -0.18<br>(0.03)*             | 0.01<br>(0.07)                  | 0.01<br>(0.07)               | -0.11<br><b>(2.5x10<sup>-5</sup>)‡</b> | -0.11<br><b>(2.5x10<sup>-5</sup>)‡</b> | 0.61<br>(0.03)*                | 0.61<br>(0.03)*              | -0.13<br>(0.69)                | -0.13<br>(0.7)               |
| Sex<br>(female) | -0.03<br>(0.40)                         | –                            | 0.01<br>(0.736)                | –                            | 0.009<br>(0.90)                | –                            | -0.003<br>(0.53)                | –                            | 0.02<br>(0.50)                         | –                                      | 0.54<br>(0.05)                 | –                            | 0.13<br>(0.71)                 | –                            |
| Age             | 0.01<br>(0.55)                          | –                            | 0.004<br>(0.74)                | 0.01<br>(0.51)               | 0.006<br>(0.89)                | –                            | -0.002<br>(0.22)                | –                            | -0.001<br>(0.91)                       | –                                      | -0.07<br>(0.60)                | –                            | 0.22<br>(0.15)                 | 0.27<br>(0.10)               |
| VA              | -0.12<br>(0.06)                         | –                            | 0.04<br>(0.40)                 | 0.04<br>(0.50)               | 0.016<br>(0.91)                | –                            | -0.003<br>(0.75)                | –                            | 0.13<br>(0.009)†                       | –                                      | -0.30<br>(0.60)                | –                            | 0.05<br>(0.93)                 | –                            |
| IOP             | -0.03<br><b>(1.24x10<sup>-9</sup>)‡</b> | –                            | -0.0005<br>(0.89)              | –                            | 0.02<br>(0.12)                 | –                            | -0.002<br><b>(0.006)†</b>       | –                            | 0.02<br><b>(3.26x10<sup>-5</sup>)‡</b> | –                                      | 0.001<br>(0.97)                | –                            | 0.09<br>(0.07)                 | 0.08<br>(0.12)               |
| CCT             | -0.002<br><b>(5.0x10<sup>-4</sup>)‡</b> | –                            | 0.0008<br>(0.03)†              | 0.0009<br>(0.02)*            | 0.002<br>(0.06)                | –                            | -7.6x10 <sup>-5</sup><br>(0.28) | –                            | 0.001<br><b>(0.005)†</b>               | –                                      | -0.004<br>(0.25)               | –                            | 0.006<br>(0.18)                | 0.006<br>(0.22)              |
| C/D ratio       | 0.25<br>(0.15)                          | –                            | -0.12<br>(0.33)                | -0.15<br>(0.33)              | 0.36<br>(0.41)                 | –                            | -0.01<br>(0.65)                 | –                            | -0.14<br>(0.31)                        | –                                      | -1.90<br>(0.19)                | –                            | -0.61<br>(0.73)                | –                            |
| MD              | -0.001<br>(0.64)                        | –                            | -0.0008<br>(0.67)              | -0.003<br>(0.20)             | 0.009<br>(0.11)                | 0.01<br>(0.06)               | 7.77x10 <sup>-5</sup><br>(0.83) | –                            | 0.002<br>(0.30)                        | –                                      | 0.01<br>(0.62)                 | –                            | -0.02<br>(0.42)                | –                            |

Statistically significant values with Bonferroni correction ( $P < 0.007$ ) are indicated in bold. adj, adjusted; unadj, unadjusted.

\*  $P < 0.05$ .

†  $P < 0.01$ .

‡  $P < 0.001$ .

**Supplementary Table S2.** Unadjusted and Adjusted Effect of Myopia and Others Covariates for the Nonglaucoma Group

|                 | CDA                                      |                                          | ICA                            |                              | OCA                            |                              | ICV                             |                              | OCV                            |                                         | PD                             |                              | Radius                         |                              |
|-----------------|------------------------------------------|------------------------------------------|--------------------------------|------------------------------|--------------------------------|------------------------------|---------------------------------|------------------------------|--------------------------------|-----------------------------------------|--------------------------------|------------------------------|--------------------------------|------------------------------|
|                 | $\beta$ unadj.<br>( <i>P</i> )           | $\beta$ adj.<br>( <i>P</i> )             | $\beta$ unadj.<br>( <i>P</i> ) | $\beta$ adj.<br>( <i>P</i> ) | $\beta$ unadj.<br>( <i>P</i> ) | $\beta$ adj.<br>( <i>P</i> ) | $\beta$ unadj.<br>( <i>P</i> )  | $\beta$ adj.<br>( <i>P</i> ) | $\beta$ unadj.<br>( <i>P</i> ) | $\beta$ adj.<br>( <i>P</i> )            | $\beta$ unadj.<br>( <i>P</i> ) | $\beta$ adj.<br>( <i>P</i> ) | $\beta$ unadj.<br>( <i>P</i> ) | $\beta$ adj.<br>( <i>P</i> ) |
| Myopia          | 0.04<br>(0.15)                           | 0.08<br><b>(0.001)†</b>                  | -0.0003<br>(0.983)             | 0.02<br>(0.43)               | -0.04<br>(0.64)                | -0.14<br>(0.09)              | -0.002<br>(0.52)                | 0.01<br>(0.23)               | -0.03<br>(0.18)                | -0.09<br><b>(7.33x10<sup>-5</sup>)‡</b> | 0.13<br>(0.67)                 | 0.62<br>(0.04)*              | -0.20<br>(0.47)                | -0.08<br>(0.82)              |
| Sex<br>(female) | -0.003<br>(0.93)                         | –                                        | -0.007<br>(0.62)               | 0.01<br>(0.70)               | -0.15<br>(0.09)                | –                            | -0.002<br>(0.67)                | –                            | -0.011<br>(0.67)               | –                                       | -0.29<br>(0.35)                | –                            | 0.28<br>(0.30)                 | –                            |
| Age             | 0.032<br>(0.05)                          | –                                        | 0.014<br>(0.10)                | 0.01<br>(0.31)               | -0.02<br>(0.71)                | –                            | -0.006<br><b>(0.004)†</b>       | -0.002<br>(0.37)             | -0.016<br>(0.28)               | –                                       | 0.13<br>(0.45)                 | –                            | -0.07<br>(0.64)                | –                            |
| VA              | -0.110<br>(0.046)*                       | -0.52<br>(0.25)                          | -0.003<br>(0.91)               | 0.05<br>(0.36)               | 0.008<br>(0.96)                | –                            | 0.012<br>(0.09)                 | -0.0008<br>(0.94)            | 0.08<br>(0.11)                 | 0.075<br>(0.05)                         | -0.24<br>(0.68)                | -0.05<br>(0.93)              | 0.44<br>(0.40)                 | -0.08<br>(0.82)              |
| IOP             | -0.017<br><b>(0.38x10<sup>-3</sup>)‡</b> | -0.03<br><b>(8.13x10<sup>-10</sup>)‡</b> | -0.003<br>(0.17)               | -0.002<br>(0.49)             | -0.01<br>(0.38)                | 0.018<br>(0.16)              | -0.002<br><b>(0.002)†</b>       | -0.002<br>(0.01)*            | 0.013<br><b>(0.001)†</b>       | 0.014<br><b>(2.52x10<sup>-5</sup>)‡</b> | -0.02<br>(0.61)                | 0.012<br>(0.78)              | 0.05<br>(0.21)                 | 0.09<br>(0.08)               |
| CCT             | -0.0006<br>(0.30)                        | –                                        | 0.0006<br>(0.01)*              | 0.0008<br>(0.03)*            | -0.0008<br>(0.66)              | –                            | 3.56x10 <sup>-5</sup><br>(0.63) | –                            | 0.0007<br>(0.12)               | –                                       | 0.0003<br>(0.95)               | –                            | 0.004<br>(0.39)                | –                            |

Statistically significant values with Bonferroni correction ( $P < 0.007$ ) are indicated in bold. adj, adjusted; unadj, unadjusted.

\*  $P < 0.05$ .

†  $P < 0.01$ .

‡  $P < 0.001$ .
